# Supplementary material
Source: publisher figshare collection journal article supplement (https://acs.figshare.com/ndownloader/files/13811321)
Supplement: Supplementary file 1 [file 13811321]

## Supplementary Information

## Guest Molecules in a Layered Microporous Tin(IV)

## Phosphonate – Phosphate Material: Solid State NMR Studies

Vladimir I. Bakmutov,\* Douglas W. Elliott, Aida R. Contreras, and Abraham Clearfield\*

Department of Chemistry, Texas A&M University, P.O. Box 30012, College Station, Texas 77842-3012, United States

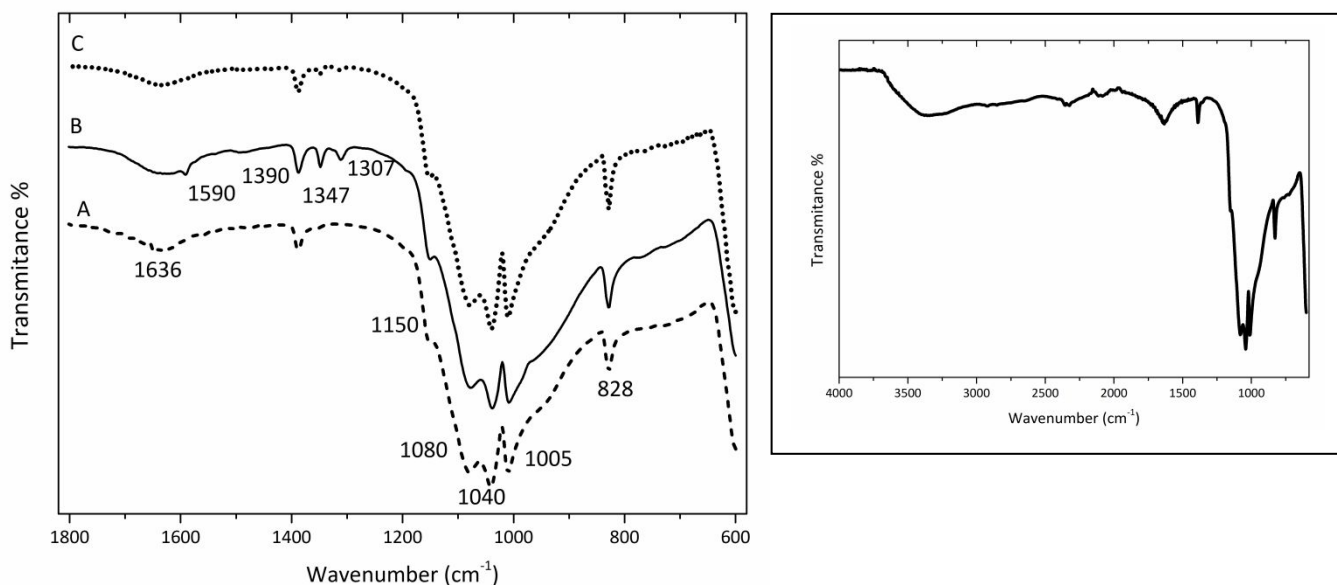

Figure S1. The room-temperature FTIR spectra recorded in the area from 1800 to 650 cm<sup>-1</sup>: compound **1** (A) and compound **1-Py-1.6** (B); compound **1-Py-1-0.6** (C); the bands at 1590, 1347 and 1307 cm<sup>-1</sup> in compounds **1-Py-1.6** and **1-Py-1-0.6** belong to NC<sub>5</sub>D<sub>5</sub>; the insert shows the full IR spectrum of **1**.

The spectra were recorded from 600 to 1800  $\text{cm}^{-1}$  at 40 scans with a FTIR Spectrophotometer IRAffinity-1 equipped with a PIKE MIRacle™ ATR sampling accessory. Compound **1-Py-1-0.6** was obtained by heating a sample of **1-Py-1.6** at 120° C for 18 hours.

**Assignments.** A broad band between 3600 and 3000  $\text{cm}^{-1}$  can be well attributed to O-H stretching modes<sup>1-3</sup> in hydrogen bonded groups O-H from water molecules, phosphate groups and phosphonate groups forming the pores; the symmetric and asymmetric P-O-C stretching modes of the phosphonate groups are seen at 828 and 1005  $\text{cm}^{-1}$ , respectively; the P-OH stretching mode<sup>3</sup> belonging to phosphonate P-OH groups forming the pores is seen at 1040  $\text{cm}^{-1}$ ; the P-C stretching region is located at 1150  $\text{cm}^{-1}$ ; the band at 1390  $\text{cm}^{-1}$  can be attributed to C=C-H stretching; and the peak at 1080  $\text{cm}^{-1}$  can be assigned to P=O groups of phosphonic acid moieties forming pores; the large shoulder at ~ 950  $\text{cm}^{-1}$  in the IR spectra of compound **1** can be attributed to the P-OH stretching of phosphate groups because of the absence of this band in the IR spectrum of the Sn(IV) phosphonate material; since a wide band at 1636  $\text{cm}^{-1}$  was also observed in the IR spectrum of the Sn(IV) phosphonate material, it can be assigned to bending mode associated with water.<sup>2</sup>

## References

- (1) Alberti, G.; Casciola, M.; Donnadio, A.; Piaggio, P.; Pica, M.; Sisani, M. Preparation and characterization of a-layered zirconium phosphate sulfophenylphosphonates with variable concentration of sulfonic groups *Solid State Ionics* **2005**, *176*, 2893 – 2898.
- (2) Iozzi, M. F.; Bisio, C.; Regi-Macedo, T.; Airoidi, C.; Cossi, M.; Marchese, L. Structural changes induced by dehydration in the crystalline layered silicate Na-RUB-18: a computational/experimental combined study. *J. Mater. Chem.*, **2009**, *19*, 2610– 2617
- (3) Paul, G.; Bisio, C.; Braschi, I.; Cossi, M.; Gatti, G.; Gianotti, E.; Marchese, L. Combined solid-state NMR, FT-IR and computational studies on layered and porous materials. *Chem. Soc. Rev.* **2018**, *47*, 5684-5739.

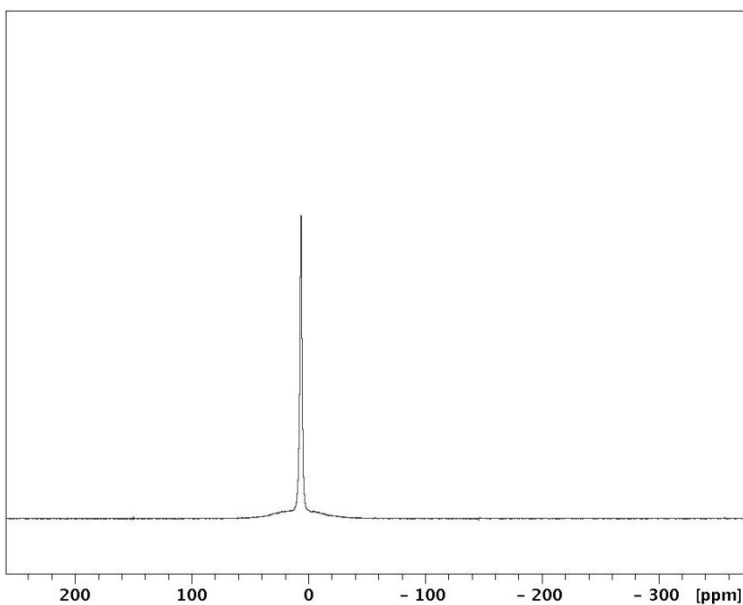

Figure S2. The static  $^1\text{H}$  NMR spectrum of compound **1** where the sharp and broad signals belong to water and phenylene protons, respectively.

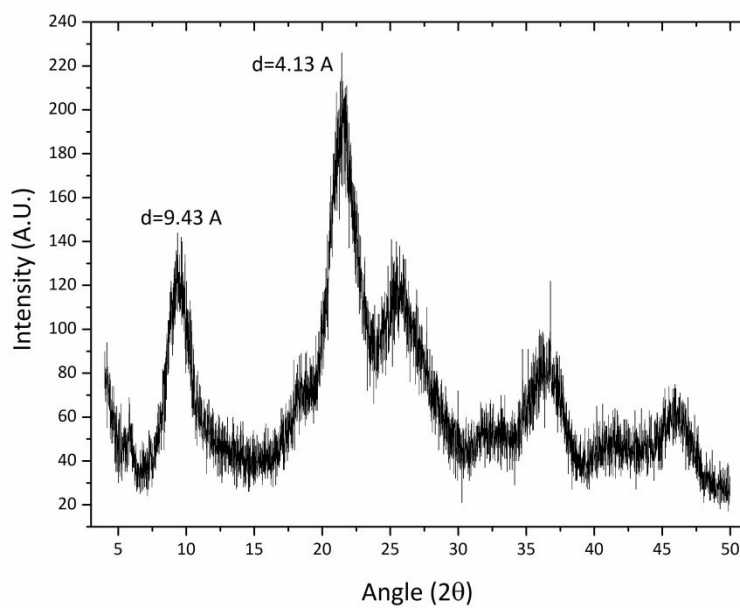

Figure S3. PXRD pattern of compound **1-Py-1.6**. Numbers listed above the peaks are the d-spacing values.

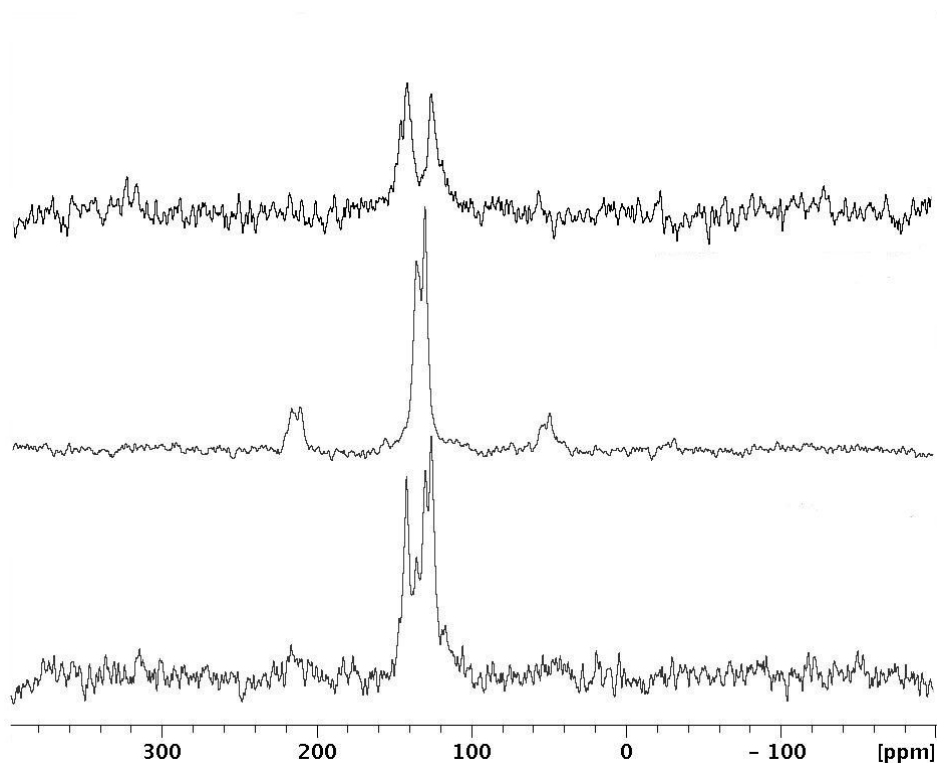

Figure S4. The static  $^{13}\text{C}\{^1\text{H}\}$  NMR spectrum of **1-Py-1.6** obtained with direct  $^{13}\text{C}$  excitation (top); the  $^{13}\text{C}\{^1\text{H}\}$  CP MAS NMR spectrum of **1-Py-1.6** (middle) and  $^{13}\text{C}\{^1\text{H}\}$  MAS NMR spectrum of **1-Py-1.6** (bottom) recorded at a spinning rate of 8.2 kHz.

Due to high mobility of pyridine, its  $^{13}\text{C}$  resonances are observed in a static sample at 147.1, 137.0 and 124 ppm typical of liquid pyridine (top); the resonances of phenylene rings are observed in the  $^{13}\text{C}\{^1\text{H}\}$  CP NMR MAS spectrum (middle); finally, all of these signals are detected in  $^{13}\text{C}\{^1\text{H}\}$  MAS NMR spectrum.

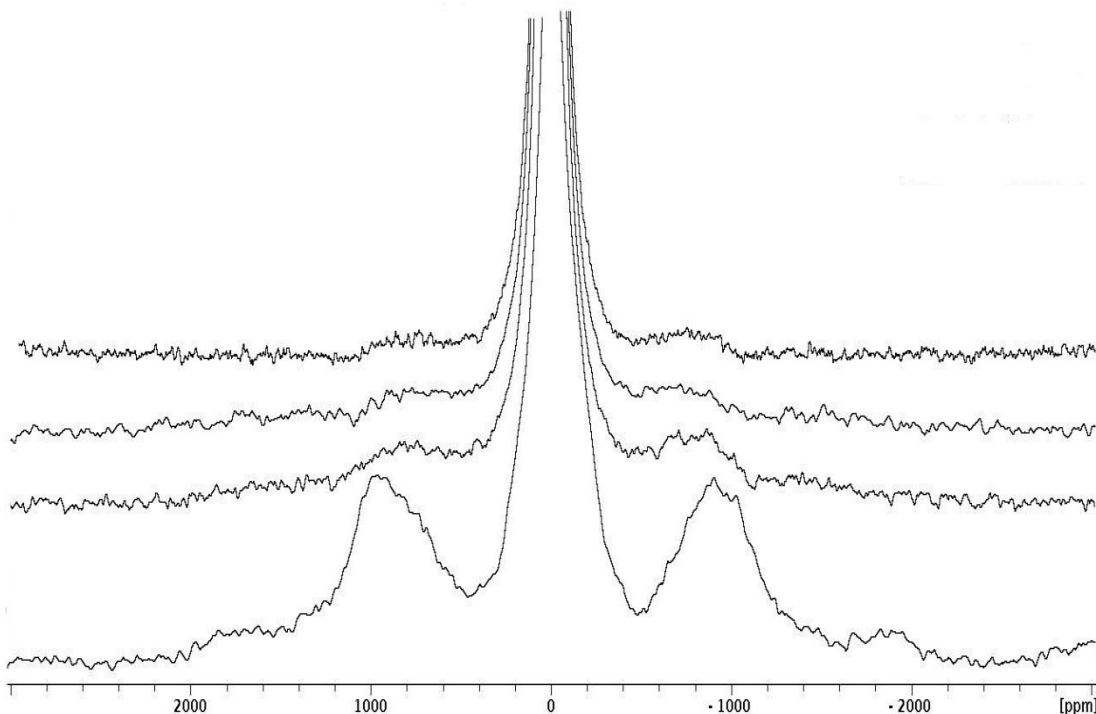

Figure S5. Variable-temperature  $^2\text{H}$  NMR spectra recorded in static compound **1-Py-1.6** from top to bottom: 283 K, 273 K, 243 K and 175 K; the spectra scaled to have the same intensity for the isotropic component.

***Comments on changes in the  $^2\text{H}$  NMR spectra of compound 1-Py-1.6 detected after its holding for 10 days.***

Figure S6 shows the VT  $^2\text{H}$  NMR spectra of a static sample of **1-Py-1.6** recorded 10 days later after preparation. Comparison with Figure 9 in the main text reveals a remarkable increase in the relative intensity of the quadrupolar pattern at low temperature corresponding immobile pyridine molecules. At the same time, the  $^{31}\text{P}\{^1\text{H}\}$  and  $^{119}\text{Sn}\{^1\text{H}\}$  MAS NMR spectra, the IR spectrum and the PXRD pattern of this sample do not change. We believe that the pyridine causes a slow reorganization of pore surface in **1**. Similarly, as it has recently been reported, the metal-organic frame work MIL-53(Cr) undergoes a contraction upon benzene adsorption.<sup>1</sup>

**Reference**

(1) D. I. Kolokolov, H. Jobic, S. Rives, P. G. Yot, J. Olivier, P. Trens, A. G. Stepanov, G. Maurin. *J. Phys. Chem. C*, **2015**, *119*, 8217-8225.

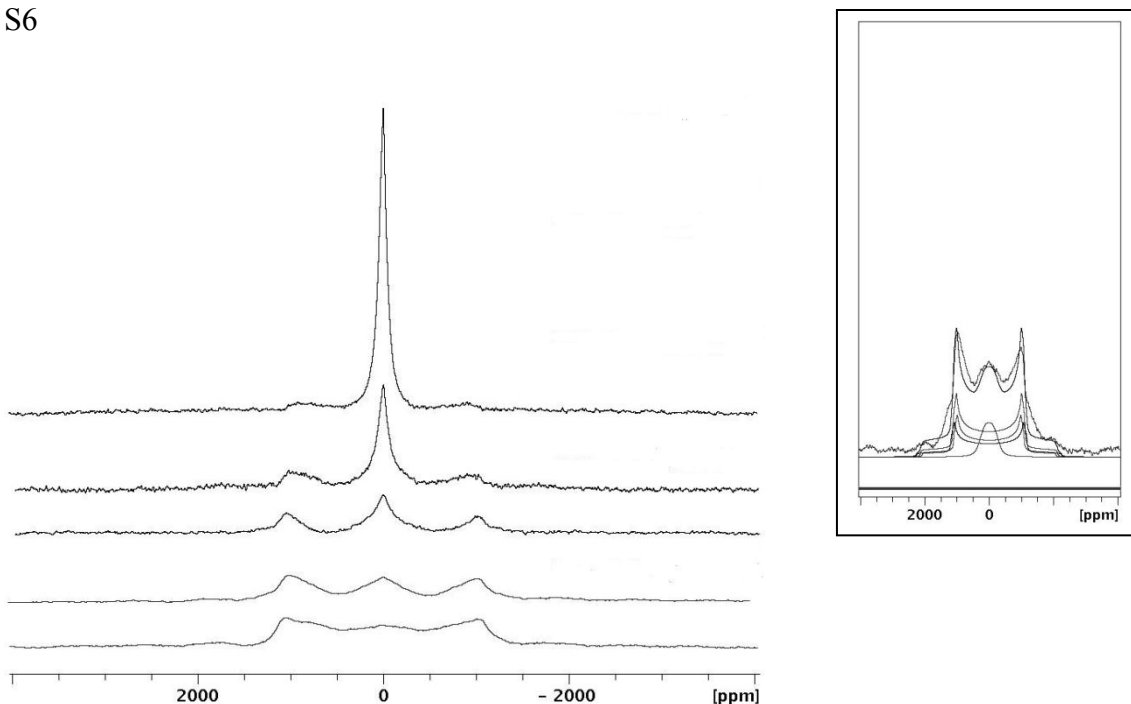

Figure S6. Variable-temperature  $^2\text{H}$  NMR spectra of a static sample of **1-Py-1.6** recorded 10 days later after preparation from top to bottom: 273 K, 243 K, 213 K, and 175 K; the insert: the  $^2\text{H}$  NMR spectrum at 193 K simulated as a combination of four sub-spectra corresponding to mobile pyridine (the central component) and the full size anisotropy of a quadrupolar tensors with static quadrupolar constants of 170, 175 and 185 kHz ( $\eta = 0.1$ ).
